# Supplementary material for: An automated machine learning approach to predict brain age from cortical anatomical measures
Source: PubMed Central journal article supplement (PMC7416036; doi:10.1002/hbm.25028), 2020-05-16
Supplement: HBM-41-3555-s001.pdf [file HBM-41-3555-s001.pdf]

## 7 Supplementary Info

| Algorithms                                                           | Sklearn Implementation    |
|----------------------------------------------------------------------|---------------------------|
| <i>Feature Selection</i>                                             |                           |
| Principle Component Analysis                                         | PCA                       |
| Fast algorithm for Independent Component Analysis                    | FastICA                   |
| Select the p-values corresponding to Family-wise error rate          | SelectFwe                 |
| Select features according to a percentile of the highest scores      | SelectPercentile          |
| Remove low-variance Features                                         | VarianceThreshold         |
| <i>Feature Generation</i>                                            |                           |
| Agglomerate features                                                 | FeatureAgglomeration      |
| <i>Regression</i>                                                    |                           |
| Elastic Net model with iterative fitting along a regularisation path | ElasticNetCV              |
| Randomised Decision Trees on sub-samples of the dataset              | ExtraTreesRegressor       |
| k-Nearest Neighbours Regression                                      | KNeighborsRegressor       |
| Cross-validated Lasso using the LARS algorithm                       | LassoLarsCV               |
| Linear Support Vector Regression                                     | LinearSVR                 |
| Linear Least squares with l2 regularisation                          | Ridge                     |
| Random Forest Regressor                                              | RandomForestRegressor     |
| Ordinary Least Squares Linear Regression                             | LinearRegression          |
| Decision Tree Regressor                                              | DecisionTreeRegressor     |
| Gaussian process regression                                          | GaussianProcessRegressors |
| Relevance Vector Regression                                          | RVR*                      |

Table S1: **List of used Feature Selection, Feature Generation and Regression Algorithms**  
 (\* : The RVR algorithm is not part of the Sklearn package but the used algorithm was provided by <https://github.com/JamesRitchie/scikit-rvm>)

Table S2: List of used Freesurfer features

---

|                                       |                                      |                                       |
|---------------------------------------|--------------------------------------|---------------------------------------|
| lh bankssts thickness                 | lh caudalanteriorcingulate thickness | lh caudalmiddlefrontal thickness      |
| lh cuneus thickness                   | lh entorhinal thickness              | lh fusiform thickness                 |
| lh inferiorparietal thickness         | lh inferiortemporal thickness        | lh isthmuscingulate thickness         |
| lh lateraloccipital thickness         | lh lateralorbitofrontal thickness    | lh lingual thickness                  |
| lh medialorbitofrontal thickness      | lh middletemporal thickness          | lh parahippocampal thickness          |
| lh paracentral thickness              | lh parsopercularis thickness         | lh parsorbitalis thickness            |
| lh parstriangularis thickness         | lh pericalcarine thickness           | lh postcentral thickness              |
| lh posteriorcingulate thickness       | lh precentral thickness              | lh precuneus thickness                |
| lh rostralanteriorcingulate thickness | lh rostralmiddlefrontal thickness    | lh superiorfrontal thickness          |
| lh superiorparietal thickness         | lh superiortemporal thickness        | lh supramarginal thickness            |
| lh frontalpole thickness              | lh temporalpole thickness            | lh transversetemporal thickness       |
| lh insula thickness                   | lh MeanThickness thickness           | rh bankssts thickness                 |
| rh caudalanteriorcingulate thickness  | rh caudalmiddlefrontal thickness     | rh cuneus thickness                   |
| rh entorhinal thickness               | rh fusiform thickness                | rh inferiorparietal thickness         |
| rh inferiortemporal thickness         | rh isthmuscingulate thickness        | rh lateraloccipital thickness         |
| rh lateralorbitofrontal thickness     | rh lingual thickness                 | rh medialorbitofrontal thickness      |
| rh middletemporal thickness           | rh parahippocampal thickness         | rh paracentral thickness              |
| rh parsopercularis thickness          | rh parsorbitalis thickness           | rh parstriangularis thickness         |
| rh pericalcarine thickness            | rh postcentral thickness             | rh posteriorcingulate thickness       |
| rh precentral thickness               | rh precuneus thickness               | rh rostralanteriorcingulate thickness |
| rh rostralmiddlefrontal thickness     | rh superiorfrontal thickness         | rh superiorparietal thickness         |
| rh superiortemporal thickness         | rh supramarginal thickness           | rh frontalpole thickness              |
| rh temporalpole thickness             | rh transversetemporal thickness      | rh insula thickness                   |
| Left-Cerebellum-White-Matter          | Left-Cerebellum-Cortex               | rh MeanThickness thickness            |
| Left-Thalamus-Proper                  | Left-Caudate                         | Left-Putamen                          |
| Left-Pallidum                         | 3rd-Ventricle                        | 4th-Ventricle                         |
| Brain-Stem                            | Left-Hippocampus                     | Left-Amygdala                         |
| CSF                                   | Left-Accumbens-area                  | Left-VentralDC                        |
| Left-vessel                           | Right-Cerebellum-White-Matter        | Right-Cerebellum-Cortex               |
| Right-Thalamus-Proper                 | Right-Caudate                        | Right-Putamen                         |
| Right-Pallidum                        | Right-Hippocampus                    | Right-Amygdala                        |
| Right-Accumbens-area                  | Right-VentralDC                      | Right-vessel                          |
| CC Posterior                          | CC Mid Posterior                     | CC Central                            |
| CC Mid Anterior                       | CC Anterior                          | rhCortexVol                           |
| CortexVol                             | lhCerebralWhiteMatterVol             | rhCerebralWhiteMatterVol              |
| CerebralWhiteMatterVol                | SubCortGrayVol                       | TotalGrayVol                          |
| SupraTentorialVol                     | SupraTentorialVolNotVent             | SupraTentorialVolNotVentVox           |
| MaskVol                               | BrainSegVol-to-eTIV                  | MaskVol-to-eTIV                       |
| EstimatedTotalIntraCranialVol         |                                      |                                       |

---

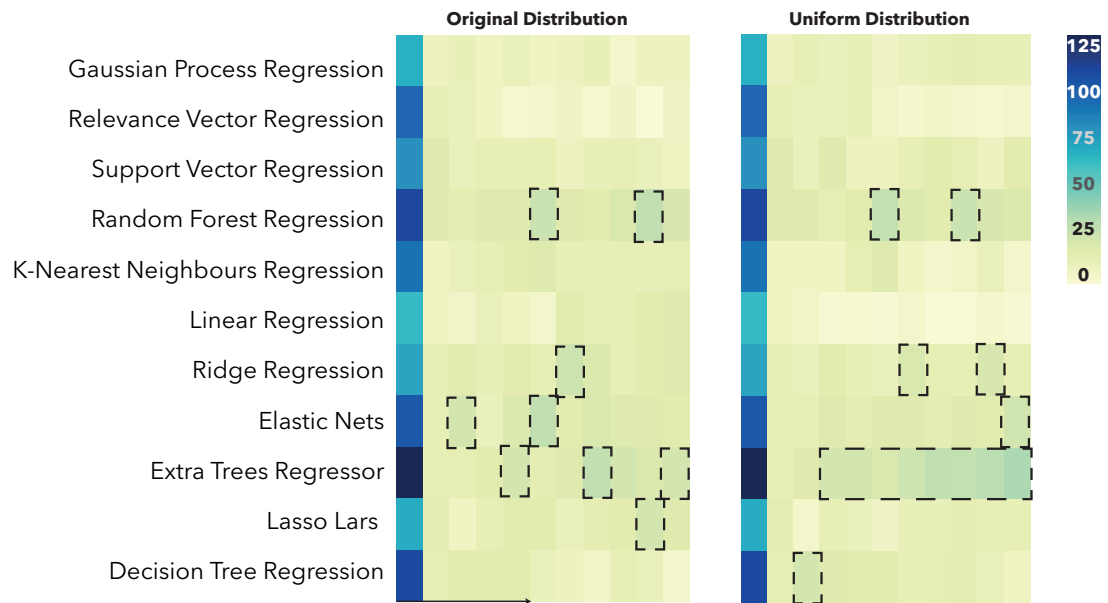

Figure S1: Model counts for the different distributions for one single repetition over the different generations. While **Left** shows the model count for the normal data distribution, **Right** illustrates the model counts for the uniform distribution. Using both distributions, the most common models explored by TPOT are Random Forest Regression, Extra Tree Regressors and Elastic Nets.
